# Supplementary material for: Multi-Mode Lanthanide-Doped Ratiometric Luminescent Nanothermometer for Near-Infrared Imaging within Biological Windows
Source: MDPI journal article supplement (doi:10.3390/nano13010219), 2023-01-03
Supplement: s1 [file s1]

# Supporting Information

## Multi-Mode Lanthanide-Doped Ratiometric Luminescent Nanothermometer for Near-Infrared Imaging within Biological Windows

Hao Li <sup>1</sup>, Esmaeil Heydari <sup>2</sup>, Yinyan Li <sup>1,\*</sup>, Hui Xu <sup>1</sup>, Shiqing Xu <sup>1</sup>, Liang Chen <sup>1,\*</sup> and Gongxun Bai <sup>1,\*</sup>

<sup>1</sup> Key Laboratory of Rare Earth Optoelectronic Materials and Devices of Zhejiang Province, China Jiliang University, Hangzhou 310018, China

<sup>2</sup> Nanophotonic Sensors & Optofluidics Lab, Faculty of Physics, Kharazmi University, Tehran 15719-14911, Iran

\* Correspondence: liyinyan@cjl.u.edu.cn (Y.L.); lchen@cjl.u.edu.cn (L.C.); baigx@cjl.u.edu.cn (G.B.)

.

**Table S1.** Comparison of optical properties of some nanomaterials and their applications in proportional nanothermometers.

| Sensing materials                                                                      | Temperature range | Sensor sensitivity     | Reference |
|----------------------------------------------------------------------------------------|-------------------|------------------------|-----------|
| CdTe                                                                                   | 80-360 K          | 0.007                  | [27]      |
| CdSe quantum dots                                                                      | 300-323 K         | 0.0069 K <sup>-1</sup> | [28]      |
| NaBiF <sub>4</sub> :Yb <sup>3+</sup> /Er <sup>3+</sup> /20%Gd <sup>3+</sup>            | 148-498 K         | 0.0037 K <sup>-1</sup> | [29]      |
| Ba <sub>2</sub> LuF <sub>7</sub> :Er <sup>3+</sup> /Yb <sup>3+</sup> /Nd <sup>3+</sup> | 308-548 K         | 0.0063 K <sup>-1</sup> | This work |

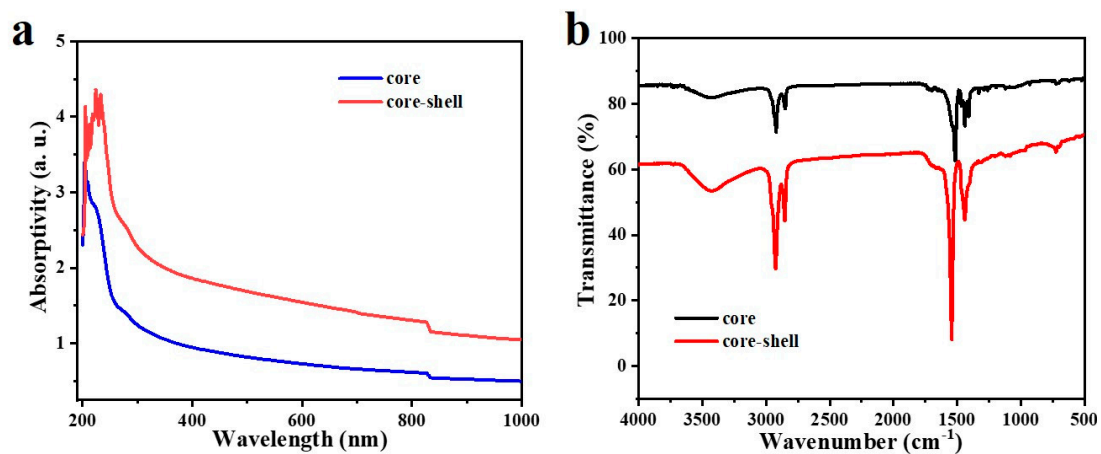

**Figure S1.** (a) UV absorption spectra of nanoparticles in cyclohexane. (b) Fourier infrared spectroscopy of nanoparticles.

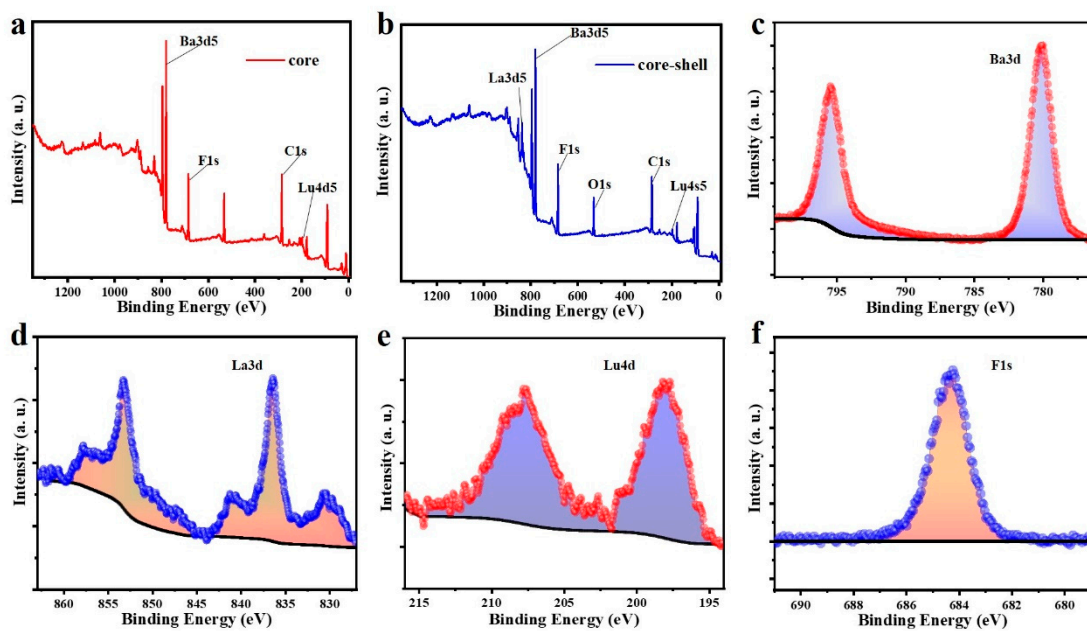

**Figure S2.** (a,b) XPS survey spectra of the  $\text{Ba}_2\text{LuF}_7$ :  $\text{Yb}^{3+}/\text{Nd}^{3+}/\text{Er}^{3+}$  and  $\text{Ba}_2\text{LuF}_7$ :  $\text{Yb}^{3+}/\text{Nd}^{3+}/\text{Er}^{3+}@\text{Ba}_2\text{LaF}_7$  nanoparticles, respectively. And deconvoluted spectra of (c) Ba 3d, (d) La 3d, (e) Lu 4d, and (f) F 1s region of  $\text{Ba}_2\text{LuF}_7@\text{Ba}_2\text{LaF}_7$ .

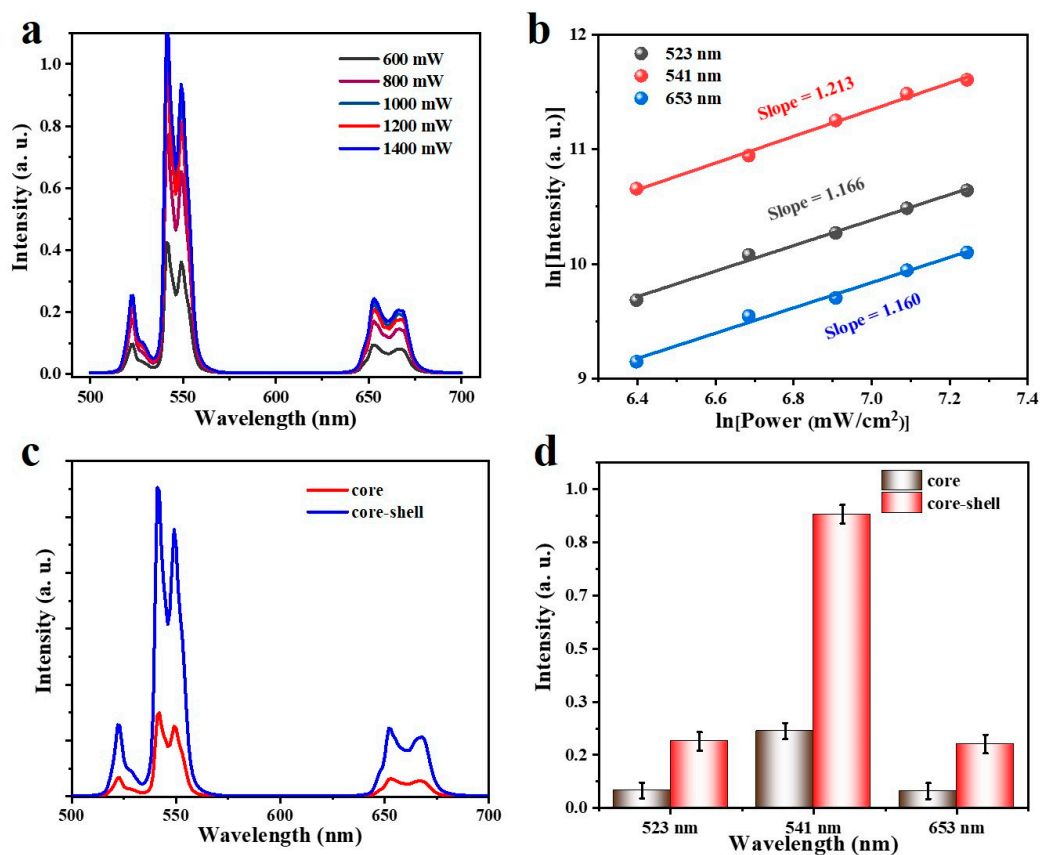

**Figure S3.** (a) Upconversion luminescence spectra in visible regions of nanocrystals excited at different power densities of 980 nm. (b) The relationship between emission intensity and excitation power. (c,d) Comparison of upconversion luminescence intensity between core and core-shell nanoparticles.

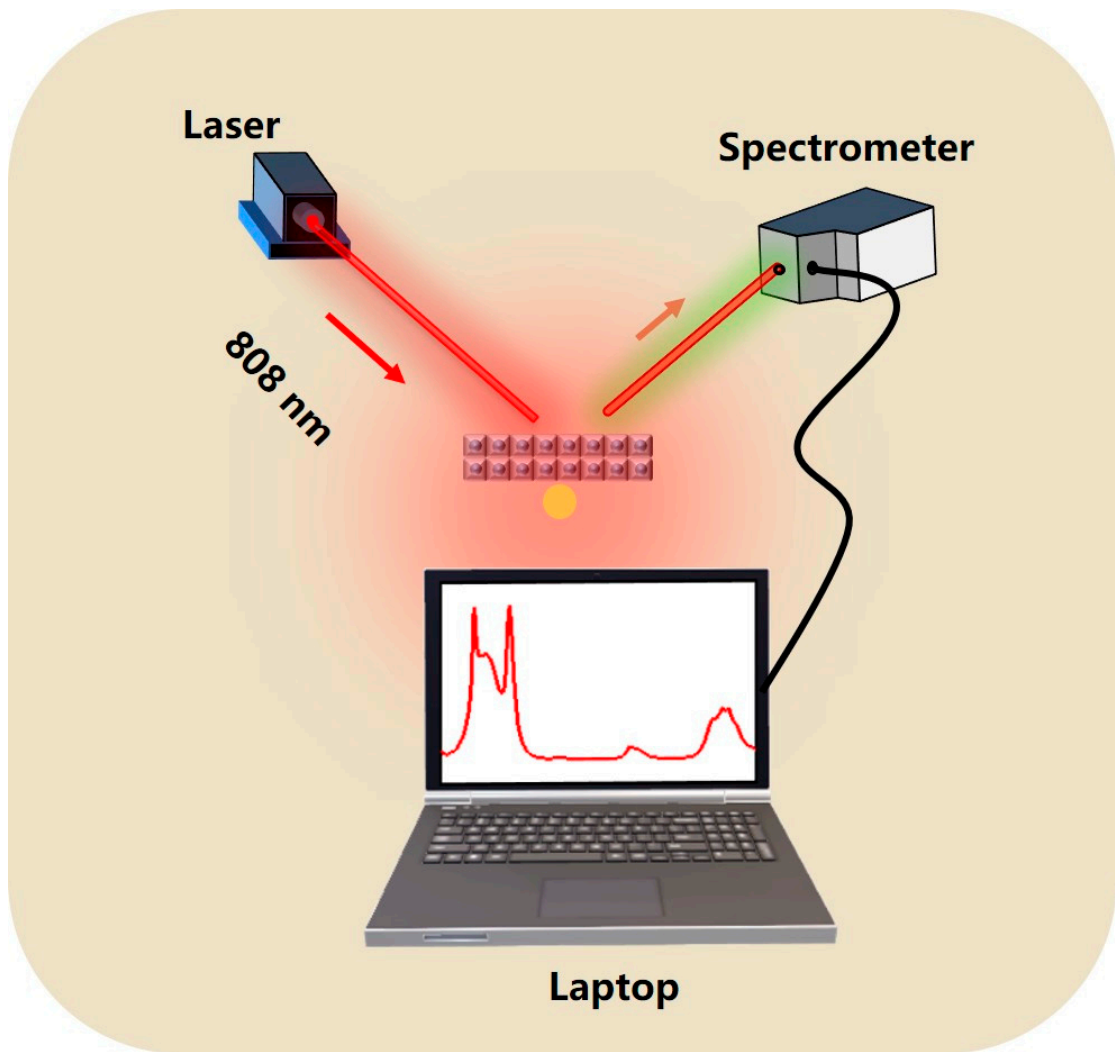

**Figure S4.** Diagram of the non-contact temperature measuring system.

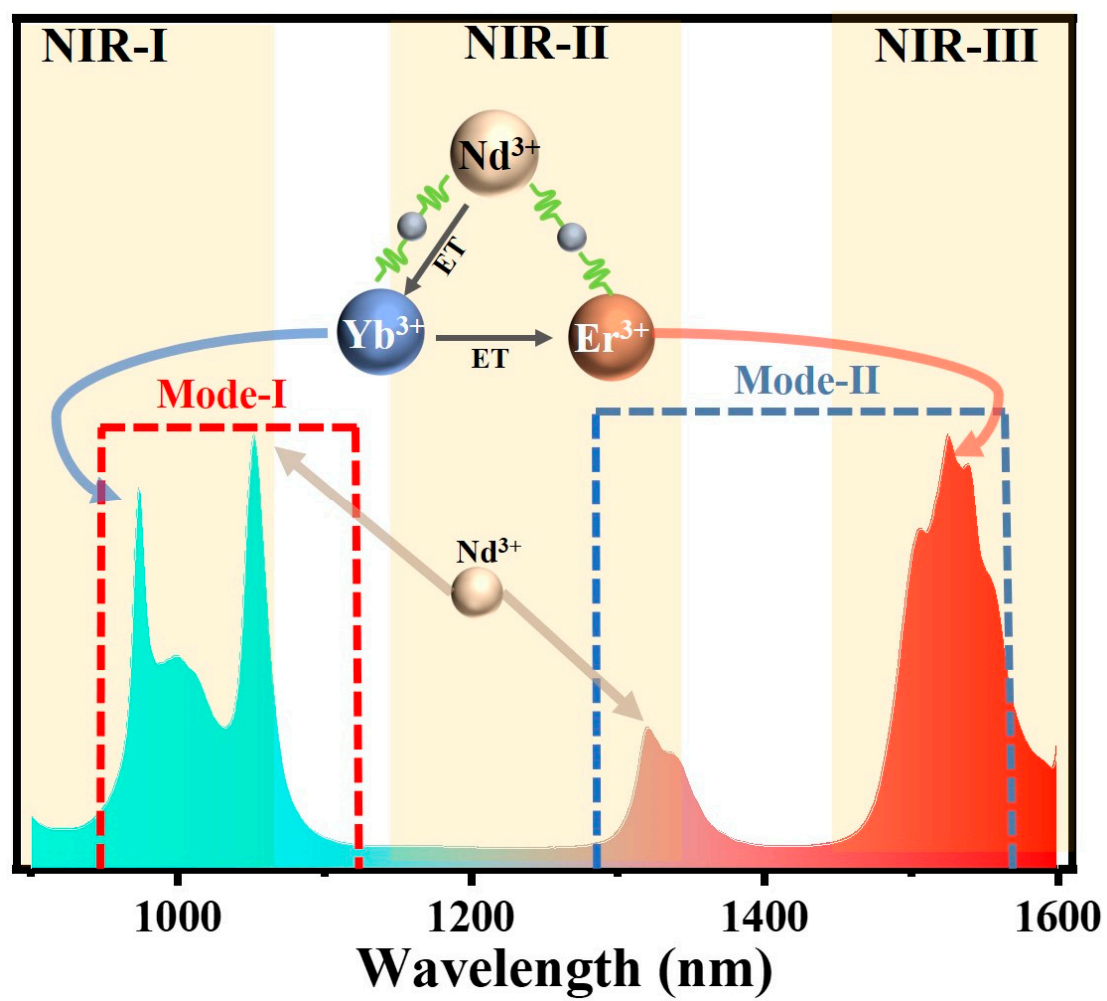

**Figure S5.** Schematic diagram of multi-mode temperature measurement principle.
